# Supplementary material for: Performance of a multi-biomarker score measuring rheumatoid arthritis disease activity in the CAMERA tight control study
Source: PubMed Central journal article supplement — Ann Rheum Dis. 2012 Oct;71(10):1692–7. doi: 10.1136/annrheumdis-2011-200963 (PMC3439649; doi:10.1136/annrheumdis-2011-200963), 2012-10
Supplement: annrheumdis-2011-200963-s1.pdf [file annrheumdis-2011-200963-s1.pdf]

**Supplementary Table 1.** Baseline demographic and clinical characteristics of subpopulation (samples available) compared to all patients of CAMERA study.

| Characteristic                  | Subgroup<br>n = 74 | All patients<br>n = 299 |
|---------------------------------|--------------------|-------------------------|
| Intensive strategy (% (n))      | 53% (39)           | 51% (151)               |
| Female gender (% (n))           | 70% (52)           | 67% (201)               |
| Age (years)                     | 53 (15)            | 53 (15)                 |
| RF positive (% (n))             | 68% (50)           | 62% (185)               |
| Morning stiffness (min)         | 97 (61)            | 92 (61)                 |
| VAS general (mm)                | 58 (23)            | 54 (24)                 |
| VAS pain (mm)                   | 54 (27)            | 51 (27)                 |
| TJC28                           | 9 (6)              | 13 (7)                  |
| SJC28                           | 10 (5)             | 13 (7)                  |
| ESR (mm/h)                      | 39 (29)            | 37 (26)                 |
| DAS28                           | 5.6 (1.0)          | 5.6 (1.1)               |
| Median radiographic score (IQR) | 0 (0-0)            | 0 (0-0)                 |
| EULAR response (at 6 months)    |                    |                         |
| Good response (% (n))           | 39% (29)           | 37% (101)               |
| Moderate response (% (n))       | 32% (24)           | 41% (113)               |
| No response (% (n))             | 28% (21)           | 22% (59)                |

Mean (standard deviation, SD) is shown for all continuous variables, except for radiographic score where median (interquartile range, IQR) is shown. For all categorical variables % (number) of patients is shown.

Subgroup= patients who had available serum samples for this analysis at either baseline, 6 months or both; All patients= all patients officially participating the CAMERA study; RF= rheumatoid factor; VAS= visual analogue scale (0-100, latter is worst score); TJC= tender joint count, based on 28 joints; SJC= swollen joint count, based on 28 joints; DAS28= disease activity score based on 28 joint count; ESR= erythrocyte sedimentation rate; Radiographic score= Sharp/van der Heijde score; EULAR response= based on the EULAR definition, calculated at 6 months of treatment.

**Supplementary Table 2.** Biomarker assay sources and median concentrations.

| Analyte      | Assay               | Median Concentration | Units  |
|--------------|---------------------|----------------------|--------|
| Calprotectin | MSD Panel E         | 1.234E+07            | pg/mL  |
| CCL22        | MSD Panel C         | 1246                 | pg/mL  |
| CRP          | MSD Panel B         | 1.163E+07            | pg/mL  |
| EGF          | MSD Panel A         | 229.7                | pg/mL  |
| ICAM-1       | MSD Panel B         | 3.543E+05            | pg/mL  |
| IL-1B        | MSD Panel A         | 0.3632               | pg/mL  |
| IL-1RA       | ELISA (R&D Systems) | 287.2                | pg/mL  |
| IL-6         | MSD Panel A         | 38.25                | pg/mL  |
| IL-6R        | MSD Panel C         | 3.901E+04            | pg/mL  |
| IL-8         | MSD Panel A         | 10.65                | pg/mL  |
| Leptin       | MSD Panel A         | 1.259E+04            | pg/mL  |
| MMP1         | MSD Panel C         | 7895                 | pg/mL  |
| MMP3         | MSD Panel C         | 4.151E+04            | pg/mL  |
| PYD          | ELISA (Quidel)      | 3.239E+00            | nmol/L |
| Resistin     | MSD Panel C         | 6502                 | pg/mL  |
| SAA          | MSD Panel B         | 6.259E+06            | pg/mL  |
| TNF-R1       | MSD Panel C         | 1931                 | pg/mL  |
| VCAM-1       | MSD Panel B         | 5.426E+05            | pg/mL  |
| VEGF-A       | MSD Panel A         | 354.4                | pg/mL  |
| YKL-40       | MSD Panel C         | 6.243E+04            | pg/mL  |

Median concentration (pg/mL) is shown for all analytes. MSD = Meso Scale Discovery.
